# Supplementary material
Source: PubMed Central journal article supplement (PMC7122394)
Supplement: NIHMS1567629-supplement-Supplementary_Information.pdf [file NIHMS1567629-supplement-Supplementary_Information.pdf]

## Supporting Information

# Consequences of Convex Nanopore Chemistry on Confined Water Dynamics

Grayson L. Jackson,<sup>†</sup> Sung A Kim,<sup>‡</sup> Ashish Jayaraman,<sup>‡</sup> Souleymane O. Diallo,<sup>§</sup> and Mahesh K. Mahanthappa<sup>†,‡,\*</sup>

<sup>†</sup>*Department of Chemistry, University of Wisconsin–Madison, 1101 University Ave., Madison, WI 53706*

<sup>‡</sup>*Department of Chemical Engineering & Materials Science, University of Minnesota, 421 Washington Ave, S.E., Minneapolis, MN 55455*

<sup>§</sup>*Chemical and Engineering Materials Division, Oak Ridge National Laboratory, Oak Ridge, TN 37831 USA*

\*Corresponding author: [maheshkm@umn.edu](mailto:maheshkm@umn.edu)

| <b>Table of Contents</b>                                                                                                       | <b>Page</b> |
|--------------------------------------------------------------------------------------------------------------------------------|-------------|
| Materials and Methods                                                                                                          | S3          |
| Synthesis of 1-Nonanesulfonic acid- <i>d</i> <sub>19</sub> ( <b>SO<sub>3</sub>Hd</b> )                                         | S3          |
| General Procedure for Deuterated Sulfonate Salt Synthesis                                                                      | S4          |
| Synthesis of Potassium 1-Nonanesulfonate- <i>d</i> <sub>19</sub> ( <b>SO<sub>3</sub>Kd</b> )                                   | S4          |
| Synthesis of Tetramethylammonium 1-Nonanesulfonate- <i>d</i> <sub>19</sub> ( <b>SO<sub>3</sub>NMe<sub>4</sub>d</b> )           | S4          |
| Lab Source Small-angle X-ray Scattering (SAXS) Analysis Conditions                                                             | S5          |
| <b>Table S1.</b> SAXS Peak Positions and Residuals for the R <sub>I</sub> phase formed by <b>SO<sub>3</sub>Kd</b> at $w_0 = 6$ | S6          |
| Electron Density Map Reconstructions to Determine Aqueous Channel Diameter and Counterion Distributions                        | S7          |

|                                                                                                                                                                        |        |
|------------------------------------------------------------------------------------------------------------------------------------------------------------------------|--------|
| <b>Table S2.</b> Electron Density Map Figures-of-Merit                                                                                                                 | S7     |
| <b>Figure S1.</b> $\beta$ versus $q$ for <b>SO<sub>3</sub>Hd</b> , <b>SO<sub>3</sub>NMe<sub>4</sub>d</b> , and <b>SO<sub>3</sub>Kd</b> from QENS fitting using Eq. (1) | S8     |
| <b>Table S3.</b> Representative QENS Fitting Parameters from Eq. (1) and R <sup>2</sup> values from Figure 5                                                           | S9     |
| <b>Figure S2.</b> Power law scaling of $1/\langle\tau_{\beta}\rangle$ vs. $q$ indicates diffusive translational water dynamics                                         | S10    |
| <b>Figure S3.</b> Electron Density Map of <b>SO<sub>3</sub>NMe<sub>4</sub>d</b> A15 phase at $w_0 = 15$                                                                | S11    |
| <b>Figure S4.</b> Electron Density Map of <b>SO<sub>3</sub>Hd</b> H <sub>1</sub> phase at $w_0 = 15$                                                                   | S12    |
| <b>Figure S5.</b> Electron Density Map of <b>SO<sub>3</sub>Hd</b> G <sub>1</sub> phase at $w_0 = 6.5$                                                                  | S13    |
| <b>Figure S6.</b> Electron Density Maps of <b>SO<sub>3</sub>Kd</b> R <sub>1</sub> phase at $w_0 = 6$ and H <sub>1</sub> phase at $w_0 = 15$                            | S14    |
| <i>SUPERFLIP</i> Input File for <b>SO<sub>3</sub>Hd</b> G <sub>1</sub> phase ( $w_0 = 6.5$ ) Charge-Flipping Electron Density Reconstruction                           | S15-16 |
| <i>SUPERFLIP</i> Input File for <b>SO<sub>3</sub>Hd</b> H <sub>1</sub> phase ( $w_0 = 15$ ) Charge-Flipping Electron Density Reconstruction                            | S17-18 |
| <i>SUPERFLIP</i> Input File for <b>SO<sub>3</sub>Kd</b> R <sub>1</sub> phase ( $w_0 = 6$ ) Charge-Flipping Electron Density Reconstruction                             | S19-20 |
| <i>SUPERFLIP</i> Input File for <b>SO<sub>3</sub>Kd</b> H <sub>1</sub> phase ( $w_0 = 15$ ) Charge-Flipping Electron Density Reconstruction                            | S21-22 |
| <i>SUPERFLIP</i> Input File for <b>SO<sub>3</sub>NMe<sub>4</sub>d</b> H <sub>1</sub> phase ( $w_0 = 6$ ) Charge-Flipping Electron Density Reconstruction               | S23-24 |
| <i>SUPERFLIP</i> Input File for <b>SO<sub>3</sub>NMe<sub>4</sub>d</b> A15 phase ( $w_0 = 12$ ) Charge-Flipping Electron Density Reconstruction                         | S25-27 |
| <i>SUPERFLIP</i> Input File for <b>SO<sub>3</sub>NMe<sub>4</sub>d</b> A15 phase ( $w_0 = 15$ ) Charge-Flipping Electron Density Reconstruction                         | S28-30 |
| References                                                                                                                                                             | S31    |

## Experimental

**Materials and Methods.** The perdeuterated reagents 1-bromononane- $d_{19}$  (98% D) and tetramethylammonium hydroxide ( $\text{N}(\text{CD}_3)_4\text{OD}\cdot 5\text{D}_2\text{O}$ , 98% D) were purchased from CDN Isotopes (Quebec, Canada) and Cambridge Isotopes, respectively. High-purity  $\text{D}_2\text{O}$  (99.9% D) was purchased from Sigma-Aldrich. All other materials and reagent grade solvents were purchased from Sigma-Aldrich (Milwaukee, WI) and used as received unless otherwise noted. Type I ultra-pure water was obtained from a Thermo Scientific Barnstead NANOpure<sup>TM</sup> system (18.2 M $\Omega$  resistance) and sparged with  $\text{N}_2(\text{g})$  prior to use. High purity niobium foil ( $0.025 \pm 0.015$  mm thick, 99.8%) was purchased from Alfa Aesar.

A Bruker Avance III HD AM-400 with a BBO SmartProbe was used to record  $^2\text{H}$  NMR spectra and  $^{13}\text{C}$  NMR spectra were recorded on a Bruker Avance III HD 500 MHz spectrometer with a TCI cryoprobe at the University of Minnesota-Twin Cities housed in the LeClaire-Dow Instrumentation Facility. The  $^2\text{H}$  spectra were recorded in the  $\text{CH}_3\text{OH}$  and referenced relative to the residual deuterated solvent peak while the  $^{13}\text{C}$  spectra were recorded in  $\text{CD}_3\text{OD}$  and referenced to the solvent peak. Atlantic Microlab, Inc. (Norcross, GA, USA) performed elemental combustion analyses (C, H, N, and S).

**$d_{19}$ -1-Nonanesulfonic acid ( $\text{SO}_3\text{Hd}$ ).** We adapted a synthetic procedure previously used by Jackson *et al.*<sup>1</sup> to prepare non-deuterated sulfonate amphiphiles. 1-bromononane- $d_{19}$  (6.0 g, 27 mmol) was mixed with ultrapure water (46 mL), anhydrous ethanol (30 mL), and  $\text{Na}_2\text{SO}_3$  (5.0 g, 40 mmol) and refluxed for 48 h in a 250 mL round bottom flask equipped with a reflux condenser. All volatiles were removed under vacuum and the resulting solid was resuspended in methanol (~50 mL) and stirred for 1 h at 50 °C. The solid byproduct was removed by filtration and all volatiles in the filtrate were removed under vacuum. The resulting white solid was triturated with diethyl ether to remove residual starting material, dried under vacuum, and recrystallized from water. This synthetic intermediate was suspended in diethyl ether and acidified using excess  $\text{HCl}(\text{g})$ . **Caution:** *This reaction generates corrosive  $\text{HCl}(\text{g})$  by adding concentrated  $\text{HCl}$  (50 mL) to concentrated  $\text{H}_2\text{SO}_4$  (50 mL), a procedure that should be performed in a fumehood with appropriate personal protective equipment, including nitrile gloves to prevent skin exposure.* The sealed reaction flask was allowed to stir overnight. The mixture was sparged with  $\text{N}_2(\text{g})$  for 15 min to remove residual  $\text{HCl}(\text{g})$  and all volatiles were removed under vacuum. The product was freeze-dried from benzene three times to yield an off-

white, crystalline powder. Yield: 70% (4.2 g, 18.5 mmol).  $^2\text{H}$  NMR (61 MHz,  $\text{CH}_3\text{OH}$ )  $\delta$  2.75 ( $\text{CD}_2\text{-SO}_3\text{H}$ , s, 2H), 1.72 ( $\text{CD}_2$ , s, 2H), 1.34 ( $\text{CD}_2$ , s, 2H), 1.24 ( $\text{CD}_2$ , s, 9H), 0.84 ( $\text{CD}_3$ , s, 3H).  $^{13}\text{C}$  NMR (126 MHz,  $\text{CD}_3\text{OD}$ )  $\delta$  51.86 ( $\text{CD}_2\text{-SO}_3\text{H}$ , p), 31.63 ( $\text{CD}_2$ , p), 29.20 ( $\text{CD}_2$ , m), 28.56 ( $\text{CD}_2$ , m), 24.88 ( $\text{CD}_2$ , p), 22.39 ( $\text{CD}_2$ , p), 13.27 ( $\text{CD}_3$ , sept). The dried powder was evenly divided to prepare two samples: a QENS sample hydrated using  $\text{H}_2\text{O}$  and a background sample hydrated with  $\text{D}_2\text{O}$ . To minimize the excess incoherent scattering due to residual  $\text{H}_2\text{O}$ , we azeotropically freeze-dried the background sample from  $\text{D}_2\text{O}$ . Elemental analysis, wherein deuterium is analyzed as hydrogen, was used to determine sample purity and estimate the residual water content of surfactant hydrates. *Anal. Calc.*:  $\text{C}_9\text{D}_{19}\text{SO}_3\text{H}\cdot 0.4\text{H}_2\text{O}$ : C, 46.07; H, 8.95; S, 13.67; Found: C, 46.08; H, 9.20; S, 14.06. For the background sample: *Anal. Calc.*:  $\text{C}_9\text{D}_{19}\text{SO}_3\text{H}\cdot 0.72\text{D}_2\text{O}$ : C, 44.96; H, 9.00; S, 13.34; Found: C, 44.96; H, 8.91; S, 13.74.

**General Procedure for Deuterated Sulfonate Salt Synthesis.** In a 250 mL round bottom flask, 1-nonanesulfonic acid (**SO<sub>3</sub>Hd**) was dissolved in methanol (~0.1 M). A stoichiometric equivalent of  $\text{K}_2\text{CO}_3$  or tetramethylammonium-*d*<sub>12</sub> hydroxide ( $\text{N}(\text{CD}_3)_4\text{OH}$ ) aqueous solution (0.03365 M) was added and the mixtures were stirred at ambient temperature for 12 h. All volatiles were removed *in vacuo* and residual water and methanol were azeotropically distilled by freeze-drying from benzene three times under vacuum. All yields were quantitative. Analogous to our treatment of **SO<sub>3</sub>Hd**, the dried powders of **SO<sub>3</sub>Kd** and **SO<sub>3</sub>NMe<sub>4</sub>d** were divided in half and used to prepare a QENS sample with  $\text{H}_2\text{O}$  and a background sample hydrated with  $\text{D}_2\text{O}$ .

**Potassium 1-nonanesulfonate-*d*<sub>19</sub> (SO<sub>3</sub>Kd).**  $^2\text{H}$  NMR (61 MHz,  $\text{CH}_3\text{OH}$ )  $\delta$  2.74 ( $\text{CD}_2\text{-SO}_3\text{H}$ , s, 2H), 1.71 ( $\text{CD}_2$ , s, 2H), 1.34 ( $\text{CD}_2$ , s, 2H), 1.24 ( $\text{CD}_2$ , s, 9H), 0.83 ( $\text{CD}_3$ , s, 3H).  $^{13}\text{C}$  NMR (126 MHz,  $\text{CD}_3\text{OD}$ )  $\delta$  51.86 ( $\text{CD}_2\text{-SO}_3\text{H}$ , p), 31.64 ( $\text{CD}_2$ , p), 29.06 ( $\text{CD}_2$ , m), 28.56 ( $\text{CD}_2$ , m), 24.88 ( $\text{CD}_2$ , p), 22.39 ( $\text{CD}_2$ , p), 13.27 ( $\text{CD}_3$ , sept). *Anal. Calc.*:  $\text{C}_9\text{D}_{19}\text{SO}_3\text{K}\cdot 0.2\text{H}_2\text{O}$ : C, 40.16; H, 7.26; S, 11.91. Found: C, 40.08; H, 7.11; S, 11.96. For the background sample: *Anal. Calc.*:  $\text{C}_9\text{D}_{19}\text{SO}_3\text{K}\cdot 0.2\text{D}_2\text{O}$ : C, 40.20; H, 7.26; S, 11.92; Found: C, 40.20; H, 7.14; S, 12.03.

**Tetramethylammonium 1-nonanesulfonate-*d*<sub>31</sub> (SO<sub>3</sub>NMe<sub>4</sub>d).**  $^2\text{H}$  NMR (61 MHz,  $\text{CH}_3\text{OH}$ )  $\delta$  3.15 ( $(\text{CD})_4\text{N}^+$ , s, 11H), 2.74 ( $\text{CD}_2\text{-SO}_3\text{H}$ , s, 2H), 1.71 ( $\text{CD}_2$ , s, 2H), 1.34 ( $\text{CD}_2$ , s, 2H), 1.24 ( $\text{CD}_2$ , s, 9H), 0.83 ( $\text{CD}_3$ , s, 3H).  $^{13}\text{C}$  NMR (126 MHz,  $\text{CD}_3\text{OD}$ )  $\delta$  54.76 ( $(\text{CD})_4\text{N}^+$ , sept) 51.93 ( $\text{CD}_2\text{-SO}_3\text{H}$ , p), 31.62 ( $\text{CD}_2$ , p), 29.05 ( $\text{CD}_2$ , m), 28.54 ( $\text{CD}_2$ , m), 24.91 ( $\text{CD}_2$ , p), 22.38 ( $\text{CD}_2$ , p), 13.28 ( $\text{CD}_3$ , sept). *Anal. Calc.*:  $\text{C}_{13}\text{D}_{31}\text{SO}_3\text{N}\cdot 0.38\text{H}_2\text{O}$ : C, 48.87; H, 10.01; S, 10.03; N, 4.38.

Found: C, 48.47; H, 9.69; S, 10.53; N, 3.99. For the background sample: *Anal.* Calc.: C<sub>13</sub>D<sub>31</sub>SO<sub>3</sub>N•0 D<sub>2</sub>O: C, 49.94; H, 9.98; S, 10.25; N, 4.48. Found: C, 49.91; H, 9.86; S, 10.49; N, 4.24.

**Lab Source Small-angle X-ray Scattering (SAXS).** LLC samples were characterized via laboratory and synchrotron X-ray scattering. The Bruker D8 Discover X-ray diffractometer housed in the University of Minnesota-Twin Cities Characterization Facility uses a Cu- $K_{\alpha}$  point source filtered with a graphite monochromator, which is collimated to a spot size of 0.5 mm. The sample-to-detector distance was 30.00 cm and two-dimensional XRD patterns were collected using a 14 cm diameter Vantec 500 area detector. All patterns were calibrated using a silver behenate standard ( $d_{100} = 58.38 \text{ \AA}$ ) and samples were typically exposed for 15 min. LLC samples were sealed within a custom-built aluminum sample cell with polyimide (Kapton®) windows. Conditions for synchrotron SAXS analyses are described in the main text.

**Table S1.** List of the observed and calculated peak positions for a normal ribbon phase (R<sub>1</sub>) of **SO<sub>3</sub>Kd** at  $w_0 = 6$  at 25 °C using the centered rectangular plane group *C2mm* (space Group #38) and unit cell parameters  $a = 28.50 \text{ \AA}$  and  $b = 86.57 \text{ \AA}$ . For a centered rectangular lattice, the scattering wavevector modulus  $|q|$  is ca

$$q^2 = 4\pi^2 \left[ \left( \frac{h}{a} \right)^2 + \left( \frac{k}{b} \right)^2 \right]$$

where  $h + k = 2n$  for the selection rules.

| Miller Index<br>( <i>h k</i> ) | $q_{\text{obs}} (\text{\AA}^{-1})$ | $q_{\text{calc}} (\text{\AA}^{-1})$ | Residual<br>$100 \cdot \Delta q / q_{\text{obs}}$ |
|--------------------------------|------------------------------------|-------------------------------------|---------------------------------------------------|
| (02)                           | 0.1445                             | 0.1452                              | -0.23                                             |
| (11)                           | 0.2316                             | 0.2321                              | 0.22                                              |
| (04)                           | 0.2900                             | 0.2903                              | 0.11                                              |
| (13)                           | 0.3095                             | 0.3099                              | 0.12                                              |
| (15)                           | 0.4243                             | 0.4246                              | 0.07                                              |
| (60)                           | 0.4345                             | 0.4355                              | 0.22                                              |
| (02)                           | 0.4407                             | 0.4409                              | 0.05                                              |
| (22)                           | 0.4642                             | 0.4642                              | 0.00                                              |
| (31)                           | 0.6651                             | 0.6654                              | 0.04                                              |
| (33)                           | 0.6959                             | 0.6963                              | 0.06                                              |

**Electron Density Map Reconstructions to Estimate Aqueous Channel Diameter and Counterion Distributions.** From the synchrotron 2D-SAXS data, we generated azimuthally-integrated  $I(2\theta)$  v.  $2\theta$  profiles and, in some cases, scaled the unit-cell size by factors of 1/2 or 1/10 to maximize computational efficiency. Using a fifth-order polynomial fit for the X-ray background, we used the *JANA2006*<sup>4</sup> software program to conduct a Le Bail refinement and thus extract the structure factor intensity ( $|F_h|$ ) for each SAXS peak in the scaled 1D SAXS profile. We were able to adequately model all peaks in these scattering traces, as indicated by goodness of fit (GOF) parameters  $< 5$  for all samples (Table S2). The  $|F_h|$  value obtained from this refinement procedure were used as inputs for the charge-flipping algorithm *SUPERFLIP*.<sup>5, 6</sup> These input files are given in the following sections. Starting from randomized initial conditions, the *SUPERFLIP* program yielded  $> 20$  independent convergences that were averaged to generate the final electron density maps. The agreement factors for the electron density maps are  $AF < 13$ , indicating acceptable fits. The VESTA software package<sup>7</sup> was used to visualize these electron density maps and to produce 1D electron density line profiles. The aqueous channel diameter was estimated using a ratiometric analysis of the number of pixels between adjacent hydrophobic interfaces at the negative 90% isosurface level in relation to the known unit-cell dimensions using Adobe Illustrator.

**Table S2. Electron Density Map Figures-of-Merit**

| System                                              | LLC Phase                                         | $d$ -spacing (Å)                                                   | Scaling Factor for <i>JANA2006</i> | Approximate Scaled $2\theta$ Range (°) | GOF  | Converged runs | AF    |
|-----------------------------------------------------|---------------------------------------------------|--------------------------------------------------------------------|------------------------------------|----------------------------------------|------|----------------|-------|
| <b>SO<sub>3</sub>Hd</b><br>$w_0 = 6.5$              | G <sub>I</sub>                                    | 71.2                                                               | 10                                 | 10-50                                  | 0.48 | 32             | 12.63 |
| <b>SO<sub>3</sub>Hd</b><br>$w_0 = 15$               | H <sub>I</sub>                                    | 37.8                                                               | 1                                  | 0.5-5.0                                | 0.31 | 82             | 3.59  |
| <b>SO<sub>3</sub>Kd</b><br>$w_0 = 6$                | R <sub>I</sub>                                    | $a = 28.5$<br>$b = 86.6$                                           | 1                                  | 0.5-6.0                                | 0.30 | 21             | 0.00  |
| <b>SO<sub>3</sub>Kd</b><br>$w_0 = 15$               | H <sub>I</sub>                                    | 36.7                                                               | 1                                  | 1.0 - 3.6                              | 4.74 | 692            | 0.00  |
| <b>SO<sub>3</sub>NMe<sub>4</sub>d</b><br>$w_0 = 6$  | H <sub>I</sub> + L <sub><math>\alpha</math></sub> | 23.3 (L <sub><math>\alpha</math></sub> )<br>33.0 (H <sub>I</sub> ) | 1                                  | 1.5-6.0                                | 0.17 | 8862           | 0.00  |
| <b>SO<sub>3</sub>NMe<sub>4</sub>d</b><br>$w_0 = 12$ | A15                                               | 73.0                                                               | 2                                  | 1.5-8.0                                | 0.31 | 23             | 2.76  |
| <b>SO<sub>3</sub>NMe<sub>4</sub>d</b><br>$w_0 = 15$ | A15                                               | 74.2                                                               | 2                                  | 1.5-8.0                                | 0.15 | 55             | 1.92  |

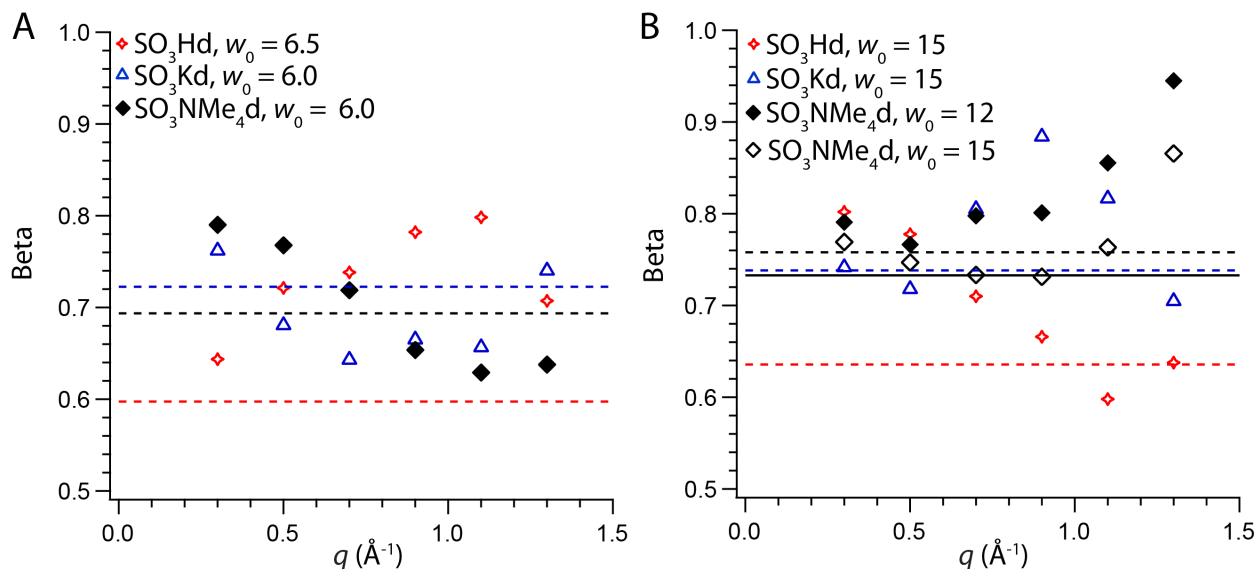

**Figure S1.** (A) Plot of  $\beta$  versus  $q$  at  $w_0 \approx 6$  comparing a fit to Eq. (1) in which  $\beta$  was either allowed to vary with  $q$  (*markers*) or simultaneously optimized over the  $q$ -range 0.2-1.4  $\text{\AA}^{-1}$  (*straight lines*). The estimated error in these values from the Mantid program is smaller than the size of the markers. (B) Analogous plot for LLC samples at higher  $w_0$ . For  $\text{SO}_3\text{NMe}_4\text{d}$ , the solid black line is for  $w_0 = 12$  and dashed black line for  $w_0 = 15$ . In both (A) and (B), the fitted values for  $\beta(q)$  do not show a strong  $q$ -dependence as demonstrated by their  $< 12\%$  relative standard deviations (*i.e.*  $100 \cdot \sigma_\beta / \beta_{\text{avg}} < 12\%$ ).



**Table S3.** Representative QENS fitting parameters from Eq. (1) and  $R^2$  values from Figure 5

| System                                | Hydration   | Q ( $\text{\AA}^{-1}$ ) | $b_w$ | $\tau$ (ps) | $\beta$ | $\langle\tau_\beta\rangle$ (ps) | $\chi^2$ | $R^2$ |
|---------------------------------------|-------------|-------------------------|-------|-------------|---------|---------------------------------|----------|-------|
| <b>SO<sub>3</sub>Hd</b>               | $w_0 = 6.5$ | 0.3                     | 0.79  | 784         | 0.597   | 1190                            | 4.04     | 0.97  |
|                                       |             | 0.5                     | 0.79  | 153         | 0.597   | 231                             |          |       |
|                                       |             | 0.7                     | 0.79  | 32.9        | 0.597   | 49.8                            |          |       |
|                                       |             | 0.9                     | 0.79  | 19.1        | 0.597   | 28.9                            |          |       |
|                                       |             | 1.1                     | 0.79  | 12.5        | 0.597   | 18.9                            |          |       |
|                                       |             | 1.3                     | 0.79  | 8.56        | 0.597   | 13.0                            |          |       |
| <b>SO<sub>3</sub>Hd</b>               | $w_0 = 15$  | 0.3                     | 1.07  | 158         | 0.636   | 221                             | 1.00     | 0.97  |
|                                       |             | 0.5                     | 1.07  | 39.8        | 0.636   | 55.8                            |          |       |
|                                       |             | 0.7                     | 1.07  | 17.8        | 0.636   | 24.9                            |          |       |
|                                       |             | 0.9                     | 1.07  | 12.5        | 0.636   | 17.5                            |          |       |
|                                       |             | 1.1                     | 1.07  | 6.51        | 0.636   | 9.12                            |          |       |
|                                       |             | 1.3                     | 1.07  | 2.16        | 0.636   | 3.03                            |          |       |
| <b>SO<sub>3</sub>NMe<sub>4</sub>d</b> | $w_0 = 6$   | 0.3                     | 0.98  | 426         | 0.694   | 544                             | 0.84     | 0.99  |
|                                       |             | 0.5                     | 0.98  | 138         | 0.694   | 176                             |          |       |
|                                       |             | 0.7                     | 0.98  | 69.9        | 0.694   | 89.3                            |          |       |
|                                       |             | 0.9                     | 0.98  | 50.4        | 0.694   | 64.4                            |          |       |
|                                       |             | 1.1                     | 0.98  | 33.6        | 0.694   | 42.9                            |          |       |
|                                       |             | 1.3                     | 0.98  | 18.5        | 0.694   | 23.6                            |          |       |
| <b>SO<sub>3</sub>NMe<sub>4</sub>d</b> | $w_0 = 12$  | 0.3                     | 0.98  | 184         | 0.733   | 223                             | 1.42     | 1.00  |
|                                       |             | 0.5                     | 0.98  | 56.4        | 0.733   | 68.5                            |          |       |
|                                       |             | 0.7                     | 0.98  | 31.0        | 0.733   | 37.6                            |          |       |
|                                       |             | 0.9                     | 0.98  | 19.9        | 0.733   | 21.2                            |          |       |
|                                       |             | 1.1                     | 0.98  | 13.4        | 0.733   | 16.3                            |          |       |
|                                       |             | 1.3                     | 0.98  | 8.01        | 0.733   | 9.73                            |          |       |
| <b>SO<sub>3</sub>NMe<sub>4</sub>d</b> | $w_0 = 15$  | 0.3                     | 0.95  | 124         | 0.758   | 147                             | 1.13     | 1.00  |
|                                       |             | 0.5                     | 0.95  | 44.7        | 0.758   | 52.8                            |          |       |
|                                       |             | 0.7                     | 0.95  | 23.9        | 0.758   | 28.2                            |          |       |
|                                       |             | 0.9                     | 0.95  | 16.1        | 0.758   | 19.0                            |          |       |
|                                       |             | 1.1                     | 0.95  | 10.6        | 0.758   | 12.5                            |          |       |
|                                       |             | 1.3                     | 0.95  | 6.32        | 0.758   | 7.46                            |          |       |
| <b>SO<sub>3</sub>K</b>                | $w_0 = 6$   | 0.3                     | 1.00  | 172         | 0.723   | 211.7                           | 1.07     | 0.99  |
|                                       |             | 0.5                     | 1.00  | 57.8        | 0.723   | 71.1                            |          |       |
|                                       |             | 0.7                     | 1.00  | 26.9        | 0.723   | 33.1                            |          |       |
|                                       |             | 0.9                     | 1.00  | 17.7        | 0.723   | 21.8                            |          |       |
|                                       |             | 1.1                     | 1.00  | 12.5        | 0.723   | 15.4                            |          |       |
|                                       |             | 1.3                     | 1.00  | 7.29        | 0.723   | 8.96                            |          |       |
| <b>SO<sub>3</sub>K</b>                | $w_0 = 15$  | 0.3                     | 0.87  | 81.7        | 0.738   | 98.6                            | 0.87     | 0.99  |
|                                       |             | 0.5                     | 0.87  | 27.7        | 0.738   | 33.4                            |          |       |
|                                       |             | 0.7                     | 0.87  | 13.5        | 0.738   | 16.3                            |          |       |
|                                       |             | 0.9                     | 0.87  | 9.06        | 0.738   | 10.9                            |          |       |
|                                       |             | 1.1                     | 0.87  | 6.55        | 0.738   | 7.90                            |          |       |
|                                       |             | 1.3                     | 0.87  | 4.86        | 0.738   | 5.86                            |          |       |

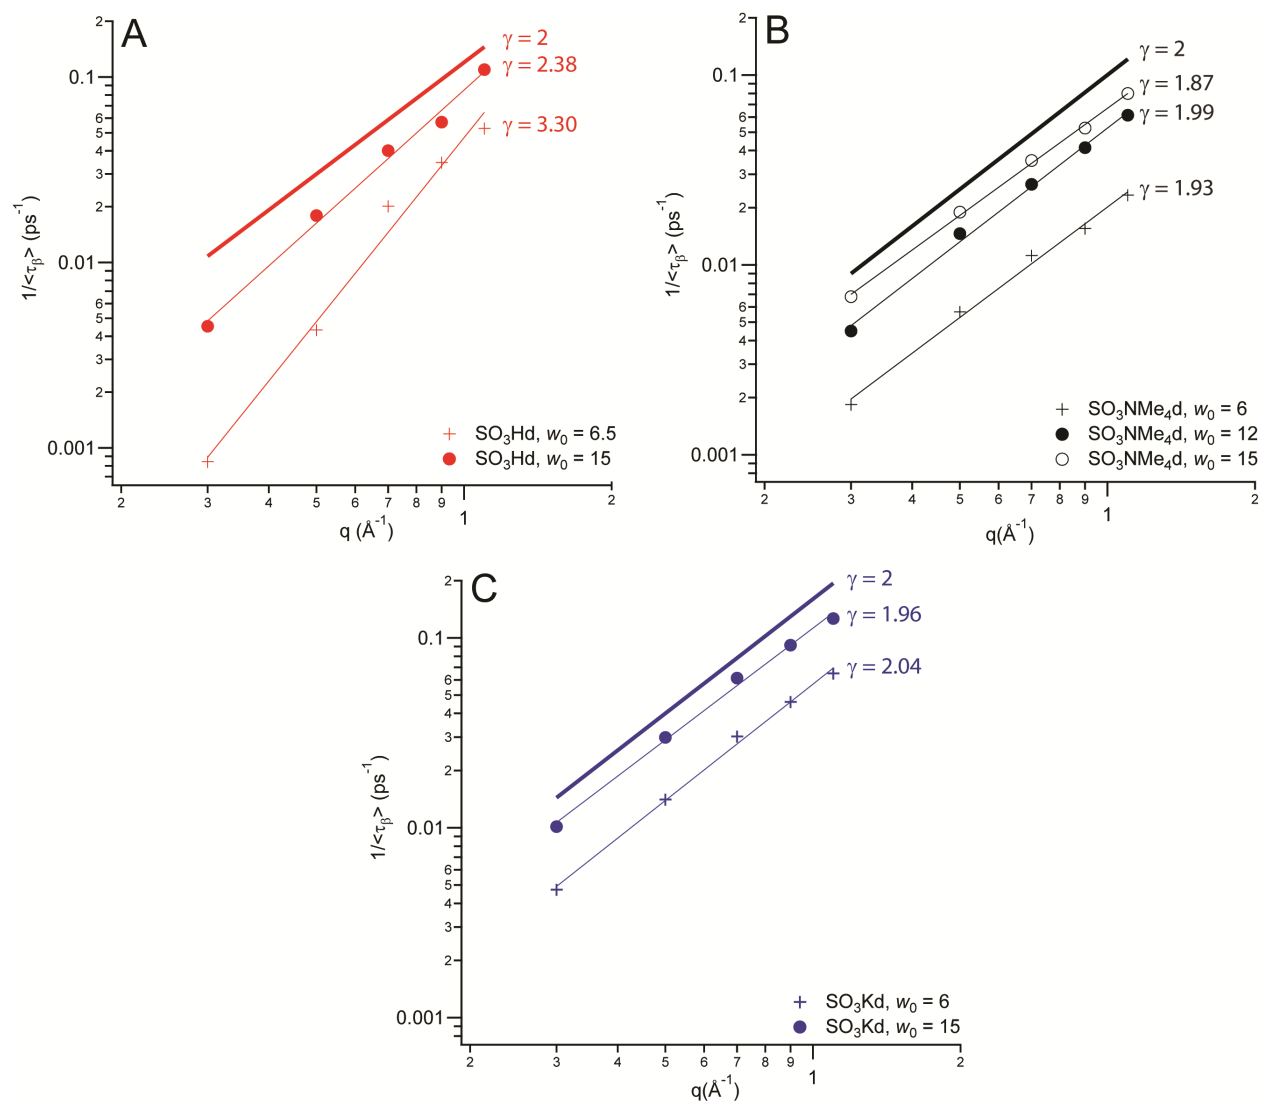

**Figure S2.** Average relaxation rate ( $1/\langle\tau_\beta\rangle$ ) plotted against  $q$  on a log-log plot for (A) **SO<sub>3</sub>Hd**, (B) **SO<sub>3</sub>NMe<sub>4</sub>d**, and (C) **SO<sub>3</sub>Kd**. The scaling exponents ( $\gamma$ ) and power law fits for  $1/\langle\tau_\beta\rangle \sim q^\gamma$  are shown for each LLC. For most systems  $\gamma \sim 2$  (*bold lines*), indicating diffusive translational water dynamics. We attribute the increased slope for **SO<sub>3</sub>Hd** to increased elastic intensity from the LLC microstructure at low  $q$  (see Figure 2 in main text for SAXS data) that is not completely captured during our QENS fitting protocol, resulting in artificially lower values for  $1/\langle\tau_\beta\rangle$ .

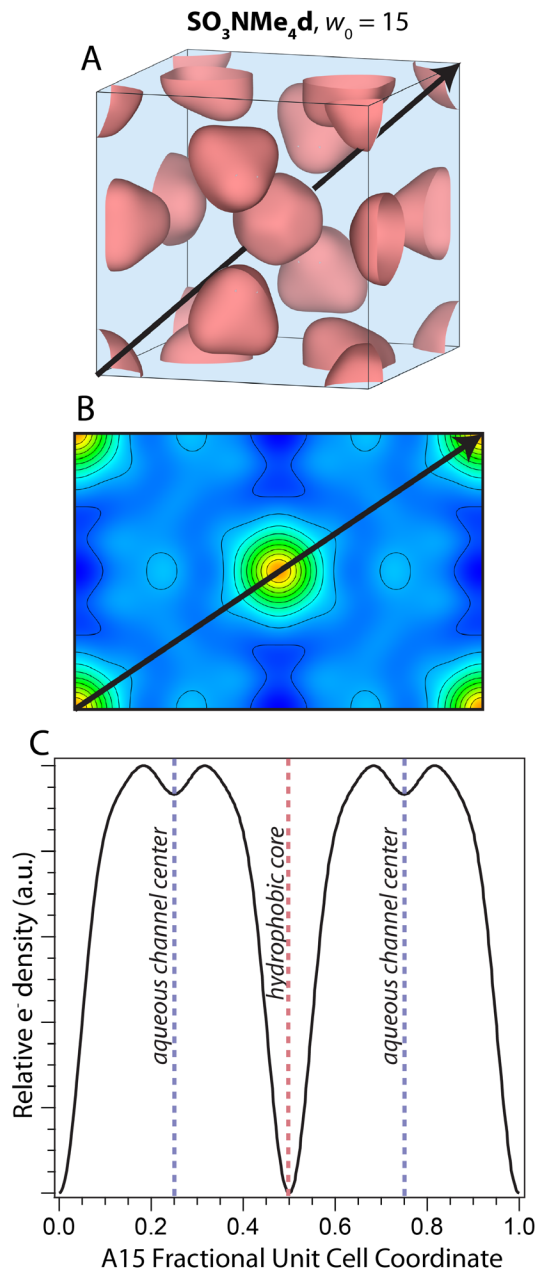

**Figure S3.** Electron density reconstruction of the **SO<sub>3</sub>NMe<sub>4</sub>d** A15 phase at  $w_0 = 15$ . (A) The 90% electron density isosurface reveals polyhedral micelles (*pink*) in a water matrix (*blue*). (B) 2D electron density map of the (110) plane from (A) with lines demarcating 10% increments in the relative electron density. (C) Linear electron density profile shown as relative electron density *versus* fractional unit cell coordinate along the [111]-direction (*black line in B*). Consistent with the A15 phase formed at  $w_0 = 12$ , the depleted electron density at the center of the aqueous channel arises from NMe<sub>4</sub><sup>+</sup> ion localization.

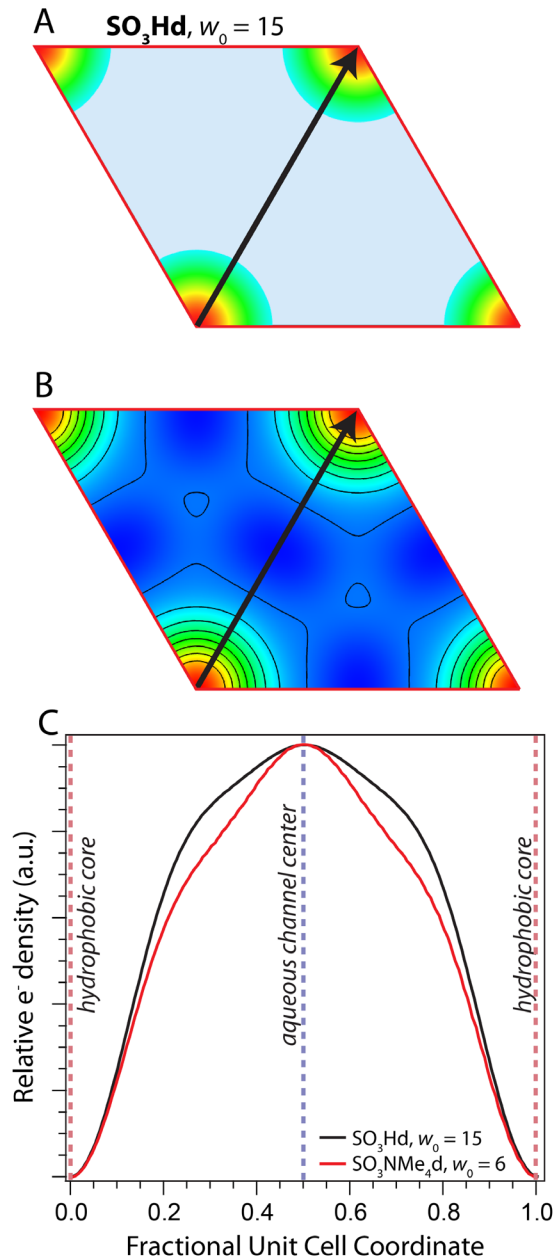

**Figure S4.** Electron density reconstruction of the  $\text{SO}_3\text{Hd}$   $\text{H}_1$  phase at  $w_0 = 15$ . (A) A view of the (01) plane with the micellar interface representing the 90% isosurface. (B) 2D electron density map of (A) with black lines denoting 10% increments in the relative electron density. (C) The relative electron density profile along the [11] direction *versus* fractional  $\text{H}_1$  unit cell coordinate for  $\text{SO}_3\text{H}$  at  $w_0 = 15$  (black trace, arrow in B) and  $\text{SO}_3\text{NMe}_4\text{d}$  at  $w_0 = 6$  (red trace, main text Figure 8). The somewhat steeper decline in electron density for  $\text{SO}_3\text{NMe}_4\text{d}$  upon moving away from the aqueous channel center arises from  $\text{NMe}_4^+$  ion localization near the micellar interface.

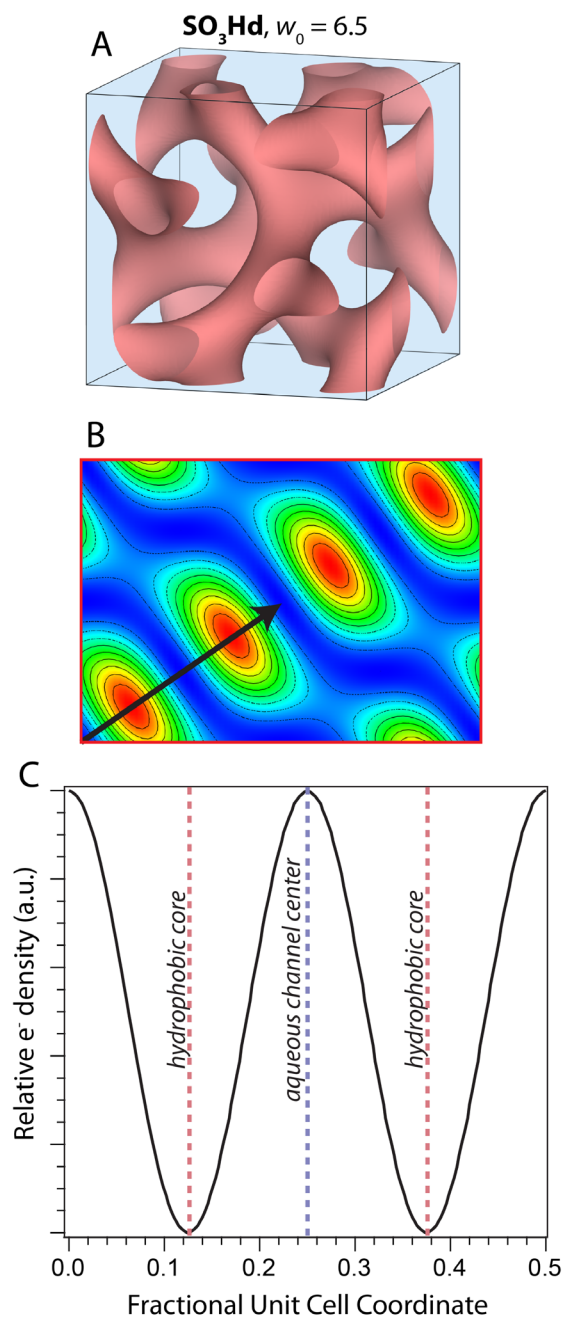

**Figure S5.** Electron density reconstruction of the  $\text{SO}_3\text{Hd}$   $G_I$  phase at  $w_0 = 6.5$ . (A) The 90% electron density isosurface shows the labyrinthine network of hydrophobic 3-fold connectors (*pink*) in a water matrix (*blue*). (B) 2D electron density map of the (110) plane with lines indicating 10% increments in the relative electron density. (C) Electron density profile along the [111] direction *versus* fractional unit cell coordinate (*arrow in B*).

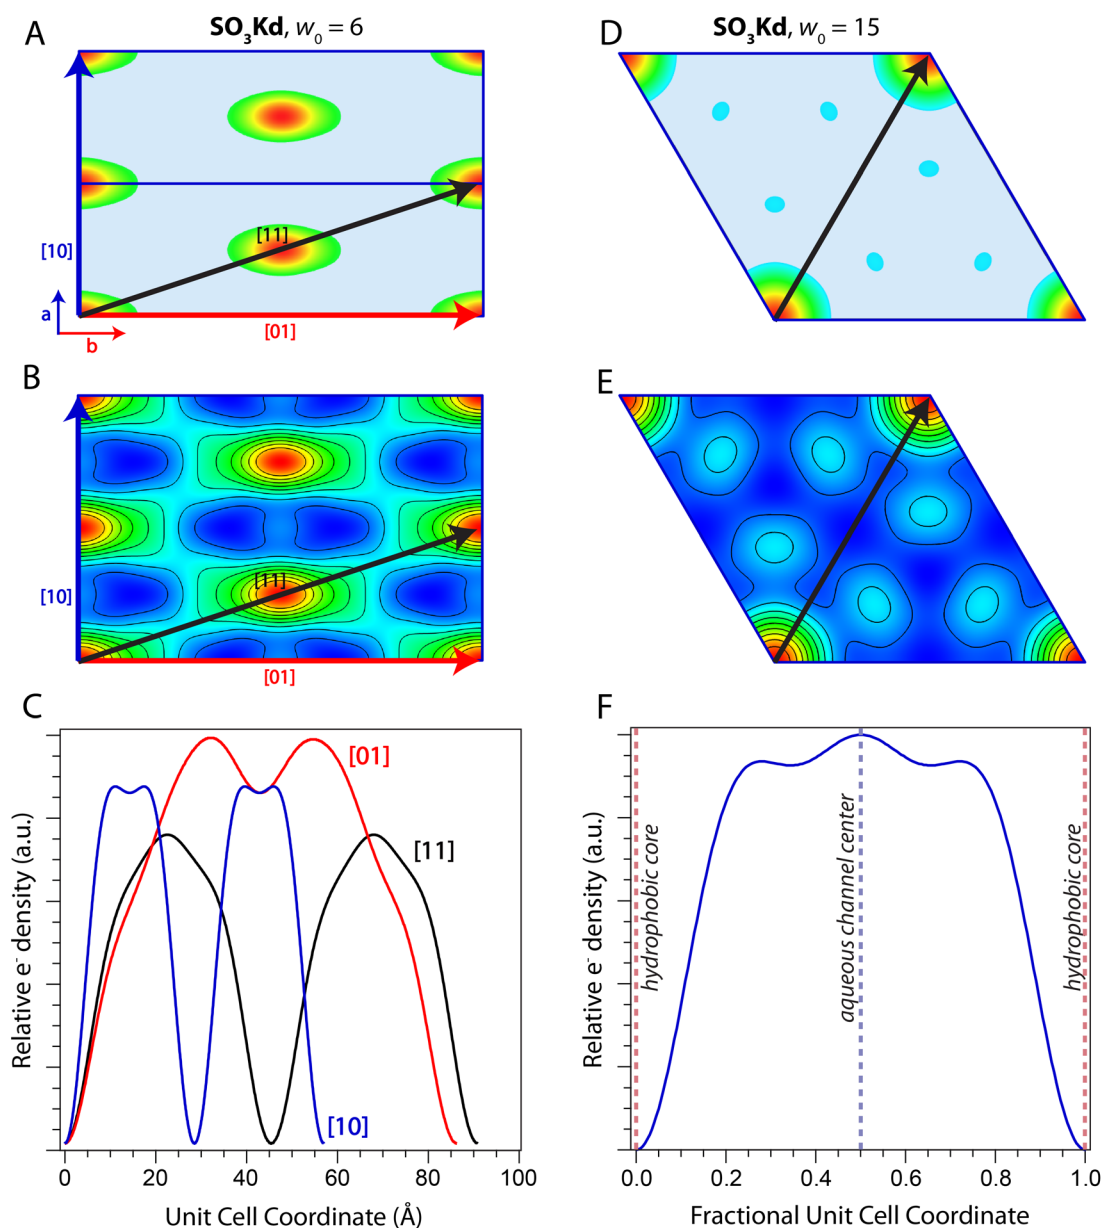

**Figure S6.** Electron density reconstructions of  $\text{SO}_3\text{Kd}$  at  $w_0 = 6$  and 15 indicate spatial localization of  $\text{K}^+$  ions. (A) 1 x 2 supercell of the  $\text{SO}_3\text{Kd}$   $R_1$  phase (01) plane with the micellar interface given by the 90% isosurface. (B) 2D electron density map with black lines indicating 10% increments in the relative electron density. (C) The linear electron density profiles given as relative electron density *versus* unit cell coordinate reveal significant differences in the electron density between the  $[10]$ ,  $[01]$ , and  $[11]$  directions, indicating that  $\text{K}^+$  ions are localized within the  $R_1$  morphology. (D) Unit cell of the  $\text{SO}_3\text{Kd}$   $H_1$  phase and (E) 2D electron density map. (F) Linear electron density profile along the  $[11]$  direction (arrow in E) peaks at the center of the aqueous channel due to  $\text{K}^+$  ion localization.

## ***SUPERFLIP* Input File for SO<sub>3</sub>Hd G<sub>1</sub> phase ( $w_0 = 6.5$ ) Charge-Flipping Electron Density Reconstruction**

```
*****start_file*****
title SGLJ_59_25_01177_00001_plot_Superflip
perform CF
outputfile "SGLJ_59_25_01177_00001_plot_Superflip.m81"
"SGLJ_59_25_01177_00001_plot_Superflip.m80"
outputformat jana
dimension 3
cell      7.1989      7.1989      7.1989      90.00      90.00      90.00
spacegroup Ia-3d
centro yes
centers
  0.000000  0.000000  0.000000
  0.500000  0.500000  0.500000
endcenters
symmetry
  x1      x2      x3
-x1+1/2  -x2     x3+1/2
  -x1     x2+1/2  -x3+1/2
  x1+1/2  -x2+1/2   -x3
   x3      x1      x2
  x3+1/2  -x1+1/2  -x2
-x3+1/2   -x1     x2+1/2
  -x3     x1+1/2  -x2+1/2
   x2      x3      x1
  -x2     x3+1/2  -x1+1/2
  x2+1/2  -x3+1/2   -x1
-x2+1/2   -x3     x1+1/2
  x2+3/4  x1+1/4  -x3+1/4
-x2+3/4  -x1+3/4  -x3+3/4
  x2+1/4  -x1+1/4  x3+3/4
-x2+1/4  x1+3/4   x3+1/4
  x1+3/4  x3+1/4  -x2+1/4
-x1+1/4  x3+3/4   x2+1/4
-x1+3/4  -x3+3/4  -x2+3/4
  x1+1/4  -x3+1/4  x2+3/4
  x3+3/4  x2+1/4  -x1+1/4
  x3+1/4  -x2+1/4  x1+3/4
-x3+1/4  x2+3/4   x1+1/4
-x3+3/4  -x2+3/4  -x1+3/4
  -x1      -x2      -x3
  x1+1/2     x2    -x3+1/2
   x1  -x2+1/2  x3+1/2
-x1+1/2  x2+1/2     x3
  -x3      -x1      -x2
-x3+1/2  x1+1/2     x2
  x3+1/2     x1    -x2+1/2
   x3  -x1+1/2  x2+1/2
  -x2      -x3      -x1
   x2  -x3+1/2  x1+1/2
-x2+1/2  x3+1/2     x1
```

```

x2+1/2      x3 -x1+1/2
-x2+1/4 -x1+3/4  x3+3/4
x2+1/4  x1+1/4  x3+1/4
-x2+3/4  x1+3/4 -x3+1/4
x2+3/4 -x1+1/4 -x3+3/4
-x1+1/4 -x3+3/4  x2+3/4
x1+3/4 -x3+1/4 -x2+3/4
x1+1/4  x3+1/4  x2+1/4
-x1+3/4  x3+3/4 -x2+1/4
-x3+1/4 -x2+3/4  x1+3/4
-x3+3/4  x2+3/4 -x1+1/4
x3+3/4 -x2+1/4 -x1+3/4
x3+1/4  x2+1/4  x1+1/4
endsymmetry
composition C9 H20 S1 O3

# Keywords for charge flipping
repeatmode 100 sumgood
bestdensities 1 symmetry
polish yes
maxcycles 5000
delta AUTO
weakratio 0.000
Biso 0.000
randomseed AUTO
searchsymmetry average
derivesymmetry no
# End of keywords for charge flipping

# EDMA-specific keywords
inputfile SGLJ_59_25_01177_00001_plot_Superflip.m81
outputbase SGLJ_59_25_01177_00001_plot_Superflip
m40forjana yes
writem40 SGLJ_59_25_01177_00001_plot_Superflip_tmp.m40
maxima all
fullcell no
scale fractional
plimit 0.3000 sigma
numberofatoms composition
centerofcharge yes
chlimit 0.2500
chlimlist 0.0188 relative
# End of EDMA-specific keywords

electrons 0.0000
dataitemwidths 4 15 15
dataformat intensity fwhm
fbegin
  1 1 2 10000.0000 0.0645
  2 0 2 2987.0444 0.0754
endf

```



## ***SUPERFLIP* Input File for SO<sub>3</sub>Hd H<sub>1</sub> phase ( $w_0 = 15$ ) Charge-Flipping Electron Density Reconstruction**

```
*****start_file*****

title SO3Hd_Wo15_d37.8_Superflip
perform CF
outputfile "SO3Hd_Wo15_d37.8_Superflip.m81"
"SO3Hd_Wo15_d37.8_Superflip.m80"
outputformat jana
dimension 3
cell 37.8078 37.8078 11.8995 90.00 90.00 120.00
spacegroup P6mm
centro no
centers
0.000000 0.000000 0.000000
endcenters
symmetry
x1 x2 x3
-x2 x1-x2 x3
-x1+x2 -x1 x3
-x1 -x2 x3
x2 -x1+x2 x3
x1-x2 x1 x3
-x2 -x1 x3
-x1+x2 x2 x3
x1 x1-x2 x3
x2 x1 x3
x1-x2 -x2 x3
-x1 -x1+x2 x3
endsymmetry
composition C378 H840 S42 O126

# Keywords for charge flipping
repeatmode 5000 sumgood
bestdensities 1 symmetry
polish yes
maxcycles 5000
delta AUTO
weakratio 0.000
Biso 0.000
randomseed AUTO
searchsymmetry average
derivesymmetry no
# End of keywords for charge flipping

# EDMA-specific keywords
inputfile SO3Hd_Wo15_d37.8_Superflip.m81
outputbase SO3Hd_Wo15_d37.8_Superflip
m40forjana yes
writem40 SO3Hd_Wo15_d37.8_Superflip_tmp.m40
maxima all
fullcell no
```

```

scale fractional
plimit      0.3000 sigma
numberofatoms composition
centerofcharge yes
chlimit     0.2500
chlimlist   0.0188 relative
# End of EDMA-specific keywords

electrons      0.0000
dataitemwidths 4 15 15
dataformat intensity fwhm
fbegin
  1  0  0      10000.0000      0.0061
  2 -1  0       2122.7334      0.0058
  2  0  0       286.3814       0.0054
  3 -1  0       107.6284       0.0076
  0  0 -1        57.8162       0.0083
  0  0  1        57.8162       0.0083
  1  0 -1         1.8262       0.0092
  1  0  1         1.8262       0.0092
  3  0  0        42.2099       0.0096
  2  0  1         0.0000       0.0117
  2  0 -1         0.0000       0.0117
  4 -2  0         0.0000       0.0120
  4 -1  0         0.0000       0.0127
  3 -1  1         0.0000       0.0137
  3 -1 -1        0.0000       0.0137
  4  0  0         0.0000       0.0145
  3  0 -1         0.0000       0.0149
  3  0  1         0.0000       0.0149
  5 -2  0         0.0000       0.0162
  4 -2  1         0.0000       0.0165
  4 -2 -1        0.0000       0.0165
  4 -1  1         0.0000       0.0170
  4 -1 -1        0.0000       0.0170
  5 -1  0         0.0000       0.0172
endf

```

## ***SUPERFLIP* Input File for SO<sub>3</sub>Kd R<sub>1</sub> phase ( $w_0 = 6$ ) Charge-Flipping Electron Density Reconstruction**

```
*****start_file*****

title SO3K_Wo6_unscaled_Superflip
perform CF
outputfile "SO3K_Wo6_unscaled_Superflip.m81"
"SO3K_Wo6_unscaled_Superflip.m80"
outputformat jana
dimension 3
cell      86.2455   28.4929   7.2000   90.00   90.00   90.00
spacegroup C2mm
centro no
centers
  0.000000  0.000000  0.000000
  0.500000  0.500000  0.000000
endcenters
symmetry
  x1  x2  x3
  x1 -x2 -x3
  x1  x2 -x3
  x1 -x2  x3
endsymmetry
composition C387 S43 O129 K43 H817

# Keywords for charge flipping
repeatmode 1500 sumgood
bestdensities 1 symmetry
polish yes
maxcycles 2000
delta AUTO
weakratio 0.000
Biso 0.000
randomseed AUTO
searchsymmetry average
derivesymmetry no
# End of keywords for charge flipping

# EDMA-specific keywords
inputfile SO3K_Wo6_unscaled_Superflip.m81
outputbase SO3K_Wo6_unscaled_Superflip
m40forjana yes
writem40 SO3K_Wo6_unscaled_Superflip_tmp.m40
maxima all
fullcell no
scale fractional
plimit 0.3000 sigma
numberofatoms composition
centerofcharge yes
chlimit 0.2500
chlimlist 0.0158 relative
# End of EDMA-specific keywords
```

```
electrons      0.0000
dataitemwidths 4 15 15
dataformat intensity fwhm
fbegin
  2  0  0      2255.8184      0.0130
  1  1  0     10000.0000      0.0105
  4  0  0       365.0109      0.0079
  3  1  0        20.4727      0.0117
  5  1  0        24.7803      0.0267
  6  0  0         51.7512      0.0281
  0  2  0       295.9213      0.0285
  2  2  0       458.7271      0.0312
  4  2  0        33.4515      0.0383
endf
```

## ***SUPERFLIP* Input File for SO<sub>3</sub>Kd H<sub>1</sub> phase ( $w_0 = 15$ ) Charge-Flipping Electron Density Reconstruction**

```
*****start_file*****

title SO3Kd_Wo15_d36.7_Jana_Superflip
perform CF
outputfile "SO3Kd_Wo15_d36.7_Jana_Superflip.m81"
"SO3Kd_Wo15_d36.7_Jana_Superflip.m80"
outputformat jana
dimension 3
cell 36.8911 36.8911 10.0000 90.00 90.00 120.00
spacegroup P6mm
centro no
centers
  0.000000 0.000000 0.000000
endcenters
symmetry
  x1 x2 x3
  -x2 x1-x2 x3
  -x1+x2 -x1 x3
  -x1 -x2 x3
  x2 -x1+x2 x3
  x1-x2 x1 x3
  -x2 -x1 x3
  -x1+x2 x2 x3
  x1 x1-x2 x3
  x2 x1 x3
  x1-x2 -x2 x3
  -x1 -x1+x2 x3
endsymmetry
composition C297 H627 S33 O99 K33

# Keywords for charge flipping
repeatmode 5000 sumgood
bestdensities 1 symmetry
polish yes
maxcycles 5000
delta AUTO
weakratio 0.000
Biso 0.000
randomseed AUTO
searchsymmetry average
derivesymmetry no
# End of keywords for charge flipping

# EDMA-specific keywords
inputfile SO3Kd_Wo15_d36.7_Jana_Superflip.m81
outputbase SO3Kd_Wo15_d36.7_Jana_Superflip
m40forjana yes
writem40 SO3Kd_Wo15_d36.7_Jana_Superflip_tmp.m40
maxima all
fullcell no
```

```
scale fractional
plimit 0.3000 sigma
numberofatoms composition
centerofcharge yes
chlimit 0.2500
chlimlist 0.0158 relative
# End of EDMA-specific keywords
```

```
electrons 0.0000
dataitemwidths 4 15 15
dataformat intensity fwhm
fbegin
  1 0 0 10000.0000 0.0629
  2 -1 0 3363.7949 0.0980
  2 0 0 827.2183 0.1098
  3 -1 0 2419.1187 0.1371
endf
```

## ***SUPERFLIP* Input File for SO<sub>3</sub>NMe<sub>4</sub>d H<sub>I</sub> phase ( $w_0 = 6$ ) Charge-Flipping Electron Density Reconstruction**

\*\*\*\*\*start\_file\*\*\*\*\*

```
title SGJ_68_new_Superflip
perform CF
outputfile "SGJ_68_new_Superflip.m81" "SGJ_68_new_Superflip.m80"
outputformat jana
dimension 3
cell 32.9612 32.9612 10.0000 90.00 90.00 120.00
spacegroup P6mm
centro no
centers
  0.000000 0.000000 0.000000
endcenters
symmetry
  x1 x2 x3
  -x2 x1-x2 x3
  -x1+x2 -x1 x3
  -x1 -x2 x3
  x2 -x1+x2 x3
  x1-x2 x1 x3
  -x2 -x1 x3
  -x1+x2 x2 x3
  x1 x1-x2 x3
  x2 x1 x3
  x1-x2 -x2 x3
  -x1 -x1+x2 x3
endsymmetry
composition C286 H682 O66 N22

# Keywords for charge flipping
repeatmode 10000 sumgood
bestdensities 1 symmetry
polish yes
maxcycles 10000
delta AUTO
weakratio 0.000
Biso 0.000
randomseed AUTO
searchsymmetry average
derivesymmetry no
# End of keywords for charge flipping

# EDMA-specific keywords
inputfile SGJ_68_new_Superflip.m81
outputbase SGJ_68_new_Superflip
m40forjana yes
writem40 SGJ_68_new_Superflip_tmp.m40
maxima all
fullcell no
scale fractional
```

```
plimit      0.3000 sigma
numberofatoms composition
centerofcharge yes
chlimit     0.2500
chlimlist   0.0375 relative
# End of EDMA-specific keywords
```

```
electrons      0.0000
dataitemwidths 4 15 15
dataformat intensity fwhm
fbegin
  1  0  0      10000.0000      0.0081
  2 -1  0       933.7727      0.0092
  2  0  0        0.5604      0.0094
  3 -1  0      188.6153      0.0138
  0  0  1       63.8442      0.0155
  0  0 -1       63.8442      0.0155
  3  0  0      14.1249      0.0167
  1  0 -1        0.0938      0.0169
  1  0  1        0.0938      0.0169
endf
```



***SUPERFLIP* Input File for SO<sub>3</sub>NMe<sub>4</sub>d A15 phase ( $w_0 = 12$ ) Charge-Flipping Electron Density Reconstruction**

\*\*\*\*\*start\_file\*\*\*\*\*

```

title SO3TMA_Wo12_Superflip
perform CF
outputfile "SO3TMA_Wo12_Superflip.m81" "SO3TMA_Wo12_Superflip.m80"
outputformat jana
dimension 3
cell 36.4779 36.4779 36.4779 90.00 90.00 90.00
spacegroup Pm-3n
centro yes
centers
  0.000000 0.000000 0.000000
endcenters
symmetry
  x1      x2      x3
  -x1     -x2     x3
  -x1     x2     -x3
  x1     -x2     -x3
  x3     x1     x2
  x3     -x1     -x2
  -x3     -x1     x2
  -x3     x1     -x2
  x2     x3     x1
  -x2     x3     -x1
  x2     -x3     -x1
  -x2     -x3     x1
  x2+1/2  x1+1/2 -x3+1/2
  -x2+1/2 -x1+1/2 -x3+1/2
  x2+1/2 -x1+1/2 x3+1/2
  -x2+1/2 x1+1/2 x3+1/2
  x1+1/2 x3+1/2 -x2+1/2
  -x1+1/2 x3+1/2 x2+1/2
  -x1+1/2 -x3+1/2 -x2+1/2
  x1+1/2 -x3+1/2 x2+1/2
  x3+1/2 x2+1/2 -x1+1/2
  x3+1/2 -x2+1/2 x1+1/2
  -x3+1/2 x2+1/2 x1+1/2
  -x3+1/2 -x2+1/2 -x1+1/2
  -x1     -x2     -x3
  x1     x2     -x3
  x1     -x2     x3
  -x1     x2     x3
  -x3     -x1     -x2
  -x3     x1     x2
  x3     x1     -x2
  x3     -x1     x2
  -x2     -x3     -x1
  x2     -x3     x1
  -x2     x3     x1
  x2     x3     -x1

```

```

-x2+1/2 -x1+1/2  x3+1/2
 x2+1/2  x1+1/2  x3+1/2
-x2+1/2  x1+1/2 -x3+1/2
 x2+1/2 -x1+1/2 -x3+1/2
-x1+1/2 -x3+1/2  x2+1/2
 x1+1/2 -x3+1/2 -x2+1/2
 x1+1/2  x3+1/2  x2+1/2
-x1+1/2  x3+1/2 -x2+1/2
-x3+1/2 -x2+1/2  x1+1/2
-x3+1/2  x2+1/2 -x1+1/2
 x3+1/2 -x2+1/2 -x1+1/2
 x3+1/2  x2+1/2  x1+1/2
endsymmetry
composition C1305 H4495 N145 O435

# Keywords for charge flipping
repeatmode 10000 sumgood
bestdensities 1 symmetry
polish yes
maxcycles 2500
delta AUTO
weakratio 0.000
Biso 0.000
randomseed AUTO
searchsymmetry average
derivesymmetry no
# End of keywords for charge flipping

# EDMA-specific keywords
inputfile SO3TMA_Wol2_Superflip.m81
outputbase SO3TMA_Wol2_Superflip
m40forjana yes
writem40 SO3TMA_Wol2_Superflip_tmp.m40
maxima all
fullcell no
scale fractional
plimit 0.3000 sigma
numberofatoms composition
centerofcharge yes
chlimit 0.2500
chlimlist 0.0375 relative
# End of EDMA-specific keywords

electrons 0.0000
dataitemwidths 4 15 15
dataformat intensity fwhm
fbegin
  1 0 1 31.0366 0.0145
  0 0 2 5112.9702 0.0152
  1 0 2 10000.0010 0.0161
  1 1 2 9164.8975 0.0167
  2 0 2 452.9376 0.0176
  1 0 3 44.5720 0.0180
  2 2 2 1247.3428 0.0180

```

|   |   |   |          |        |
|---|---|---|----------|--------|
| 2 | 0 | 3 | 432.7714 | 0.0179 |
| 2 | 1 | 3 | 376.8265 | 0.0177 |
| 0 | 0 | 4 | 716.5313 | 0.0168 |
| 1 | 0 | 4 | 452.4106 | 0.0162 |
| 3 | 0 | 3 | 98.8717  | 0.0181 |
| 1 | 1 | 4 | 98.8717  | 0.0181 |
| 2 | 0 | 4 | 24.3707  | 0.0218 |
| 2 | 1 | 4 | 16.8763  | 0.0235 |
| 3 | 2 | 3 | 55.6948  | 0.0250 |
| 2 | 2 | 4 | 78.0731  | 0.0279 |
| 3 | 0 | 4 | 54.4285  | 0.0293 |
| 1 | 0 | 5 | 22.5996  | 0.0306 |
| 3 | 1 | 4 | 22.5996  | 0.0306 |
| 3 | 2 | 4 | 71.8064  | 0.0343 |
| 2 | 0 | 5 | 71.8064  | 0.0343 |
| 2 | 1 | 5 | 42.0632  | 0.0354 |
| 4 | 0 | 4 | 47.7017  | 0.0377 |
| 3 | 0 | 5 | 0.0000   | 0.0398 |
| 3 | 3 | 4 | 0.0000   | 0.0398 |
| 3 | 1 | 5 | 0.0000   | 0.0409 |
| 0 | 0 | 6 | 0.0000   | 0.0419 |
| 4 | 2 | 4 | 0.0000   | 0.0419 |
| 1 | 0 | 6 | 0.0000   | 0.0429 |
| 1 | 1 | 6 | 0.0000   | 0.0439 |
| 3 | 2 | 5 | 0.0000   | 0.0439 |
| 2 | 0 | 6 | 0.0000   | 0.0458 |
| 2 | 1 | 6 | 0.0000   | 0.0468 |
| 4 | 0 | 5 | 0.0000   | 0.0468 |
| 4 | 1 | 5 | 0.0000   | 0.0477 |
| 2 | 2 | 6 | 0.0000   | 0.0495 |
| 3 | 0 | 6 | 0.0000   | 0.0504 |
| 4 | 2 | 5 | 0.0000   | 0.0504 |
| 3 | 1 | 6 | 0.0000   | 0.0513 |
| 4 | 4 | 4 | 0.0000   | 0.0530 |
| 3 | 2 | 6 | 0.0000   | 0.0539 |
| 5 | 0 | 5 | 0.0000   | 0.0547 |
| 4 | 3 | 5 | 0.0000   | 0.0547 |
| 1 | 0 | 7 | 0.0000   | 0.0547 |
| 4 | 0 | 6 | 0.0000   | 0.0564 |
| 4 | 1 | 6 | 0.0000   | 0.0572 |
| 2 | 0 | 7 | 0.0000   | 0.0572 |
| 5 | 2 | 5 | 0.0000   | 0.0580 |
| 2 | 1 | 7 | 0.0000   | 0.0580 |
| 3 | 3 | 6 | 0.0000   | 0.0580 |

endf

***SUPERFLIP* Input File for SO<sub>3</sub>NMe<sub>4</sub>d A15 phase ( $w_0 = 15$ ) Charge-Flipping Electron Density Reconstruction**

\*\*\*\*\*start\_file\*\*\*\*\*

```

title SO3TMA_Wo15_Superflip
perform CF
outputfile "SO3TMA_Wo15_Superflip.m81" "SO3TMA_Wo15_Superflip.m80"
outputformat jana
dimension 3
cell 37.1243 37.1243 37.1243 90.00 90.00 90.00
spacegroup Pm-3n
centro yes
centers
  0.000000 0.000000 0.000000
endcenters
symmetry
  x1      x2      x3
  -x1     -x2     x3
  -x1      x2     -x3
  x1     -x2     -x3
  x3      x1      x2
  x3     -x1     -x2
  -x3     -x1     x2
  -x3      x1     -x2
  x2      x3      x1
  -x2      x3     -x1
  x2     -x3     -x1
  -x2     -x3     x1
  x2+1/2  x1+1/2 -x3+1/2
 -x2+1/2 -x1+1/2 -x3+1/2
  x2+1/2 -x1+1/2  x3+1/2
 -x2+1/2  x1+1/2  x3+1/2
  x1+1/2  x3+1/2 -x2+1/2
 -x1+1/2  x3+1/2  x2+1/2
 -x1+1/2 -x3+1/2 -x2+1/2
  x1+1/2 -x3+1/2  x2+1/2
  x3+1/2  x2+1/2 -x1+1/2
  x3+1/2 -x2+1/2  x1+1/2
 -x3+1/2  x2+1/2  x1+1/2
 -x3+1/2 -x2+1/2 -x1+1/2
  -x1      -x2     -x3
   x1      x2     -x3
   x1     -x2     x3
  -x1      x2     x3
  -x3     -x1     -x2
  -x3      x1     x2
   x3      x1     -x2
   x3     -x1     x2
  -x2     -x3     -x1
   x2     -x3     x1
  -x2      x3     x1
   x2      x3     -x1

```

```

-x2+1/2 -x1+1/2  x3+1/2
 x2+1/2  x1+1/2  x3+1/2
-x2+1/2  x1+1/2 -x3+1/2
 x2+1/2 -x1+1/2 -x3+1/2
-x1+1/2 -x3+1/2  x2+1/2
 x1+1/2 -x3+1/2 -x2+1/2
 x1+1/2  x3+1/2  x2+1/2
-x1+1/2  x3+1/2 -x2+1/2
-x3+1/2 -x2+1/2  x1+1/2
-x3+1/2  x2+1/2 -x1+1/2
 x3+1/2 -x2+1/2 -x1+1/2
 x3+1/2  x2+1/2  x1+1/2
endsymmetry
composition C1368 H4712 N152 O456

# Keywords for charge flipping
repeatmode 10000 sumgood
bestdensities 1 symmetry
polish yes
maxcycles 2500
delta AUTO
weakratio 0.000
Biso 0.000
randomseed AUTO
searchsymmetry average
derivesymmetry no
# End of keywords for charge flipping

# EDMA-specific keywords
inputfile SO3TMA_Wo15_Superflip.m81
outputbase SO3TMA_Wo15_Superflip
m40forjana yes
writem40 SO3TMA_Wo15_Superflip_tmp.m40
maxima all
fullcell no
scale fractional
plimit 0.3000 sigma
numberofatoms composition
centerofcharge yes
chlimit 0.2500
chlimlist 0.0375 relative
# End of EDMA-specific keywords

electrons 0.0000
dataitemwidths 4 15 15
dataformat intensity fwhm
fbegin
  1 0 1 28.4806 0.0167
  0 0 2 5342.5327 0.0169
  1 0 2 9852.8613 0.0170
  1 1 2 10000.0020 0.0170
  2 0 2 383.3503 0.0169
  1 0 3 4.4922 0.0168
  2 2 2 2277.3516 0.0166

```

|   |   |   |           |        |
|---|---|---|-----------|--------|
| 2 | 0 | 3 | 988.8835  | 0.0165 |
| 2 | 1 | 3 | 1030.8788 | 0.0164 |
| 0 | 0 | 4 | 1725.5237 | 0.0161 |
| 1 | 0 | 4 | 487.4051  | 0.0159 |
| 3 | 0 | 3 | 145.1292  | 0.0157 |
| 1 | 1 | 4 | 145.1292  | 0.0157 |
| 2 | 0 | 4 | 44.6244   | 0.0152 |
| 2 | 1 | 4 | 0.5640    | 0.0150 |
| 3 | 2 | 3 | 15.3639   | 0.0146 |
| 2 | 2 | 4 | 46.0763   | 0.0139 |
| 3 | 0 | 4 | 27.6270   | 0.0135 |
| 1 | 0 | 5 | 10.3073   | 0.0131 |
| 3 | 1 | 4 | 10.3073   | 0.0131 |
| 3 | 2 | 4 | 96.9543   | 0.0155 |
| 2 | 0 | 5 | 96.9543   | 0.0155 |
| 2 | 1 | 5 | 67.5026   | 0.0164 |
| 4 | 0 | 4 | 148.6081  | 0.0179 |

endf

## References

1. Jackson, G. L.; Perroni, D. V.; Mahanthappa, M. K. Roles of Chemical Functionality and Pore Curvature in the Design of Nanoporous Proton Conductors. *J. Phys. Chem. B* **2017**, *121*, 9429-9436.
2. Sato, T.; Hossain, M. K.; Acharya, D. P.; Glatter, O.; Chiba, A.; Kunieda, H. Phase Behavior and Self-Organized Structures in Water/Poly(Oxyethylene) Cholesteryl Ether Systems. *J. Phys. Chem. B* **2004**, *108*, 12927-12939.
3. Hyde, S. T., Identification of Lyotropic Liquid Crystalline Mesophases. In *Handbook of Applied Surface and Colloid Chemistry*, Holmberg, K., Ed. J. Wiley & Sons: 2001; pp 299-332.
4. Petříček, V.; Dušek, M.; Palatinus, L. Crystallographic Computing System *JANA2006*: General Features. *Z. Kristallogr.-Cryst. Mater.* **2014**, *229*, 345-352.
5. Palatinus, L.; Chapuis, G. *SUPERFLIP* - a Computer Program for the Solution of Crystal Structures by Charge Flipping in Arbitrary Dimensions. *J. Appl. Crystallogr.* **2007**, *40*, 786-790.
6. Baerlocher, C. M., Lynne B.; Palatinus, Lukas. Charge Flipping Combined with Histogram Matching to Solve Complex Crystal Structures from Powder Diffraction Data. *Z. Kristallogr.-Cryst. Mater.* **2009**, *222*, 47-53.
7. Momma, K.; Izumi, F. *VESTA 3* for Three-Dimensional Visualization of Crystal, Volumetric and Morphology Data. *J. Appl. Crystallogr.* **2011**, *44*, 1272-1276.
